# Supplementary material for: Plasma Cytokines/Chemokines as Predictive Biomarkers for Lymphedema in Breast Cancer Patients
Source: MDPI journal article supplement (doi:10.3390/cancers15030676), 2023-01-21
Supplement: s1 [file s1]

## **Full inclusion and exclusion criteria for recruiting study subjects**

### **Inclusion criteria:**

- 1) Participants must be at least 18 years of age
- 2) Participants must be clinically diagnosed with breast cancer
- 3) Patients must plan to undergo treatment with surgery and radiation therapy at MDACC
- 4) Clinical stage N2-N3; or clinical stage N1 with an intention to treat with axillary lymph node dissection and regional nodal radiation
- 5) Ambulatory and possessing all four limbs
- 6) No prior radiation therapy targeted to lymph nodes
- 7) Fluency in English or Spanish.

### **Exclusion Criteria:**

- 1) Participants with a known or suspected allergy to iodine
- 2) Participants who are breastfeeding, pregnant or trying to become pregnant
- 3) Severe underlying chronic illness or disease (other than breast cancer)
- 4) Participants not capable of keeping moderately still for the imaging portion of the study session (~1 hour for imaging)

We will review medical and family history as we analyze data collected at each of the six study visits.

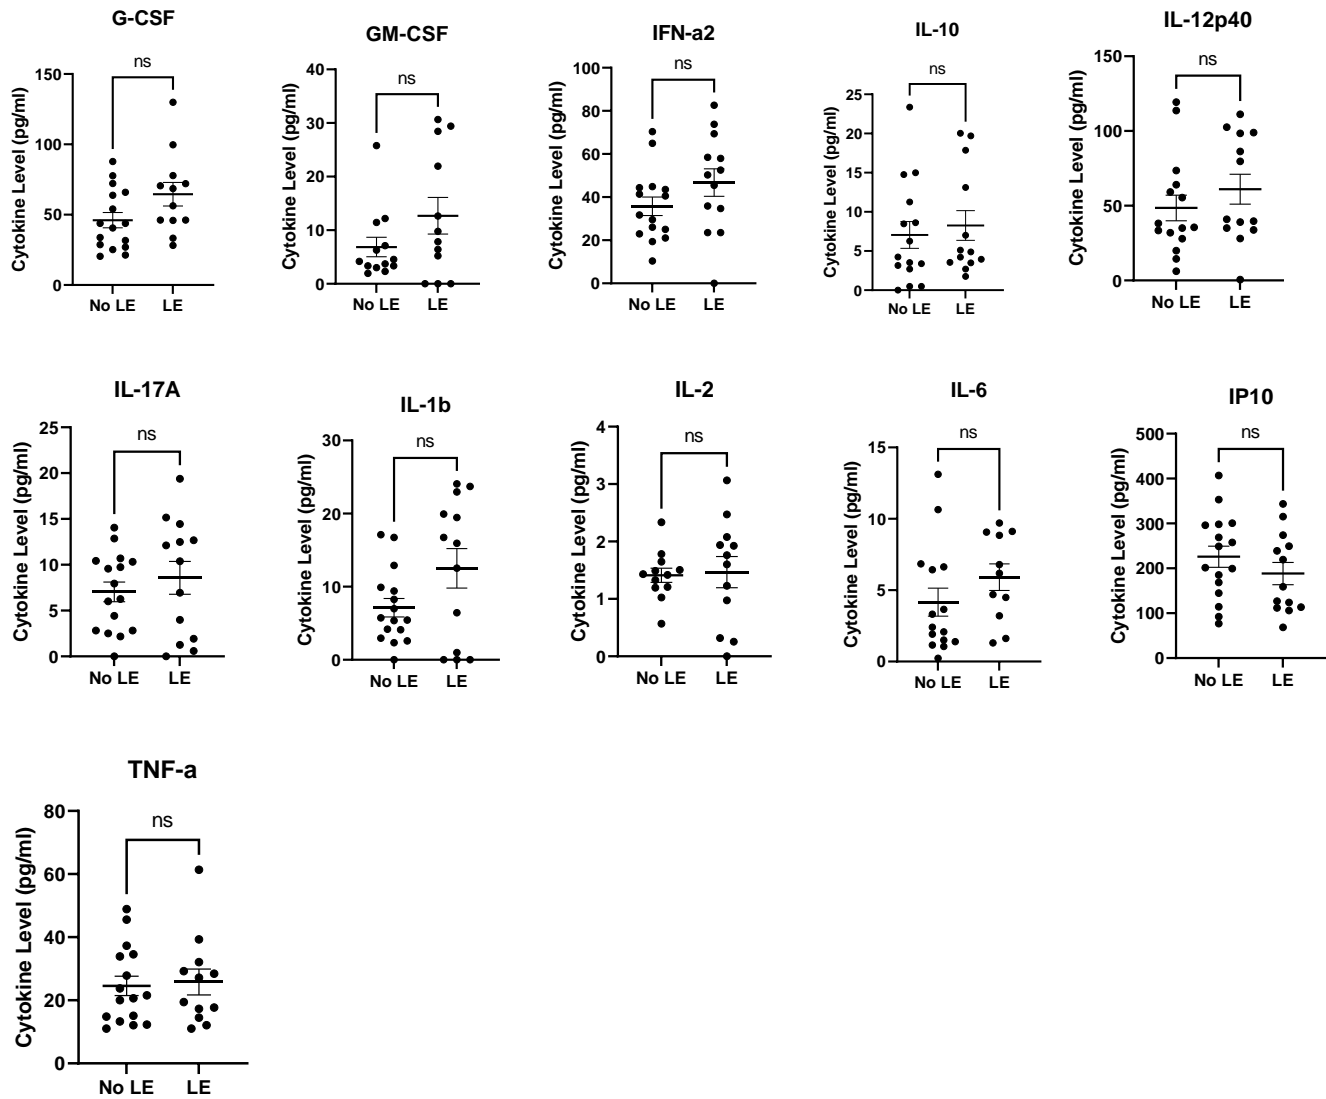

**Supplemental Figure S1.** Statistically non-significant plasma cytokines/chemokines at 12 months post-RT in subjects with clinical BCRL at 12 months post-RT.

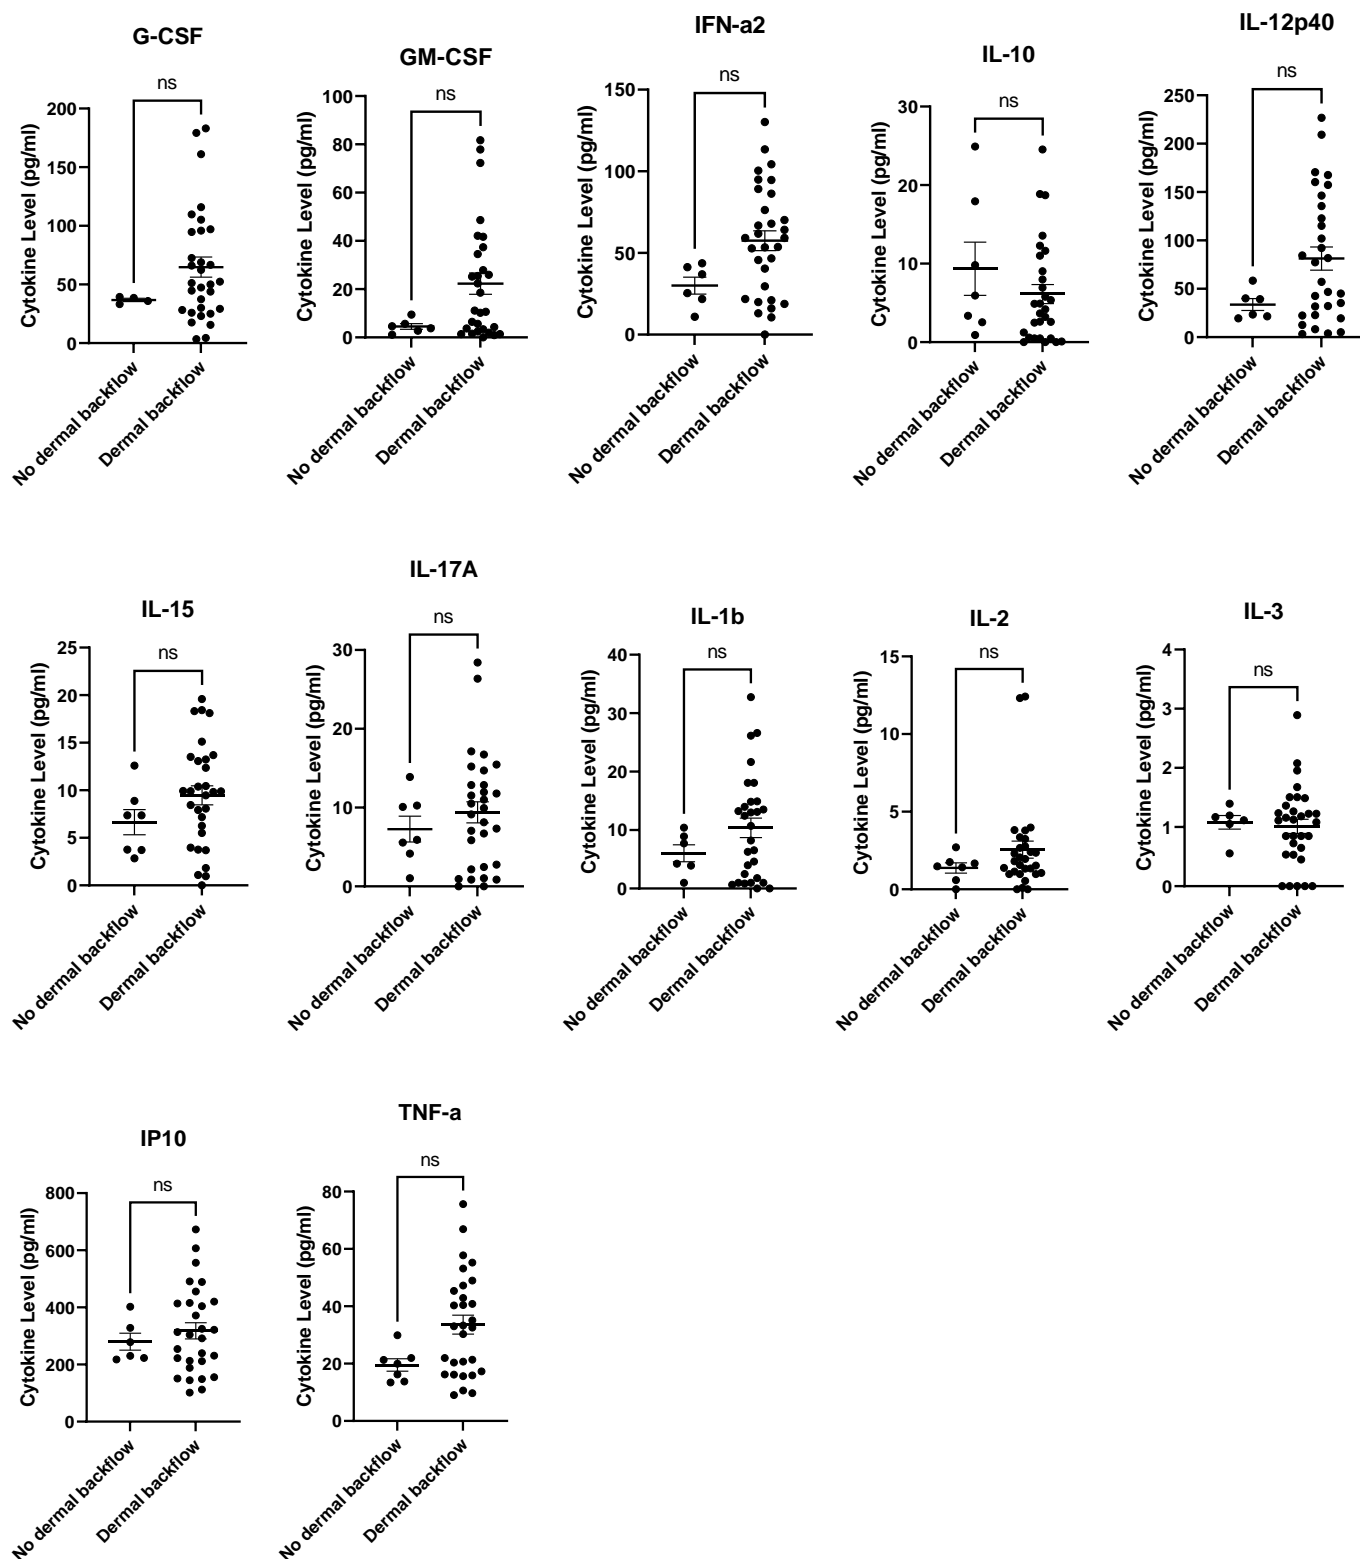

**Supplemental Figure S2.** Pre -ALND cytokine/chemokine levels were statistically non-significant in subjects displaying dermal backflow at 12 months post-RT.

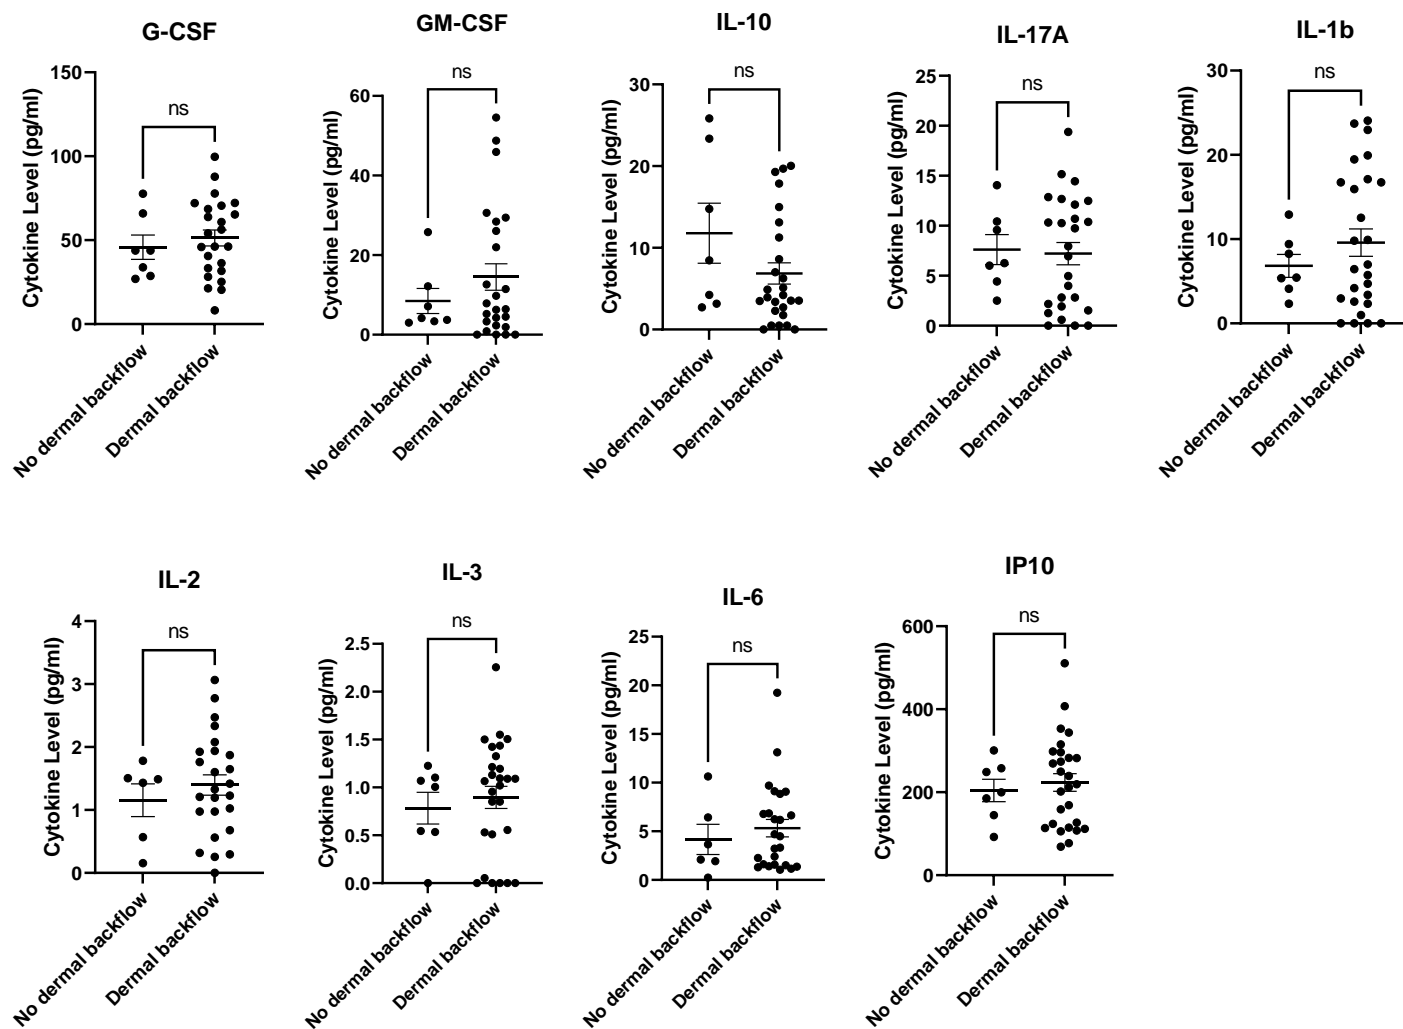

**Supplemental Figure S3.** Plasma cytokine/chemokine levels at 12 months post-RT were non-significant in subjects with dermal backflow at 12 months post-RT.

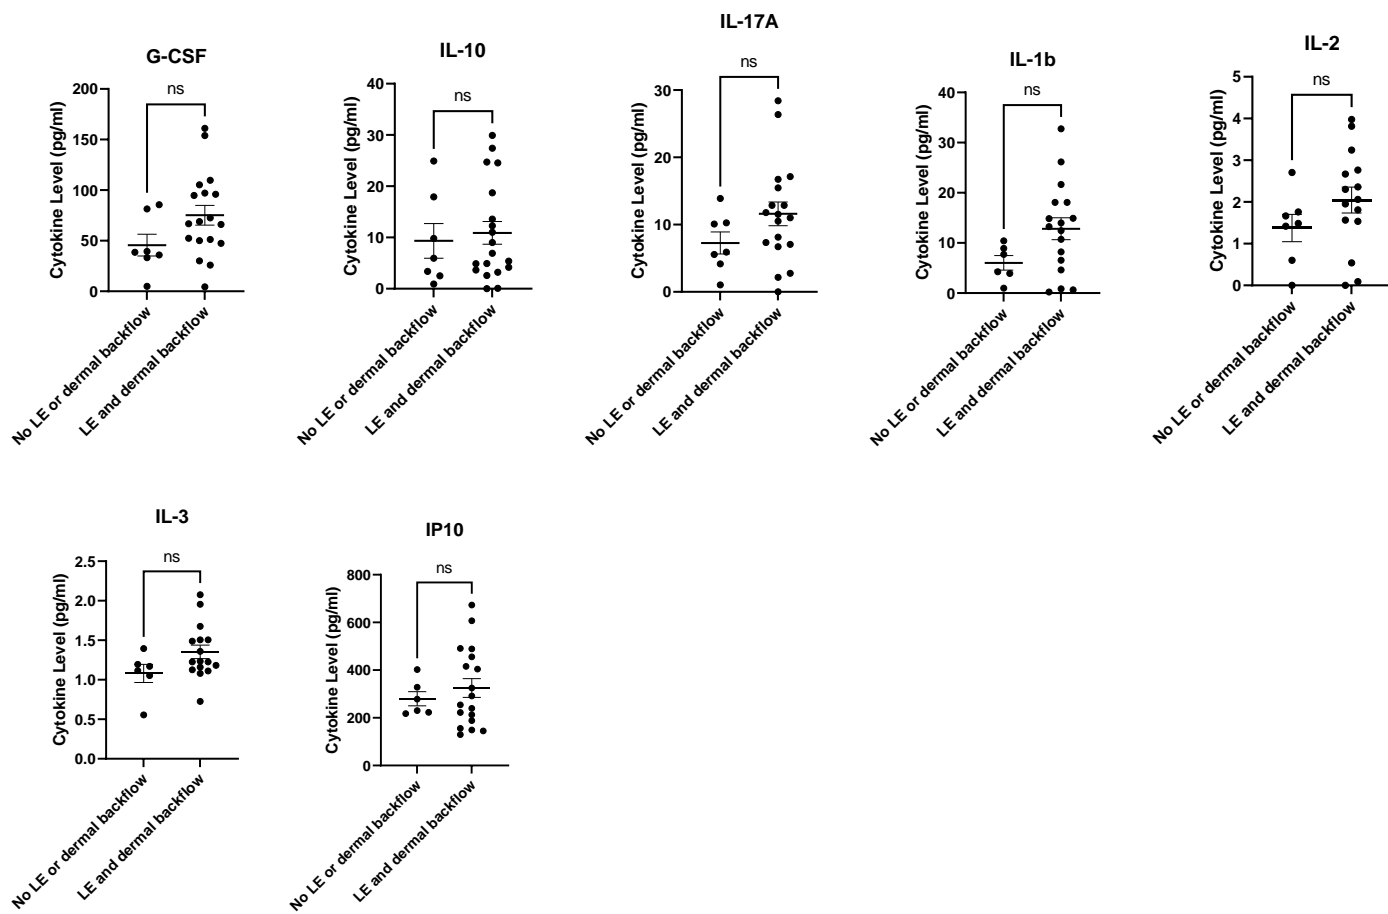

**Supplemental Figure S4.** Non-significant plasma cytokine/chemokine levels at pre-ALND in subjects with both clinical BCRL and dermal backflow at 12 months post-RT compared to those without clinical BCRL or dermal backflow.

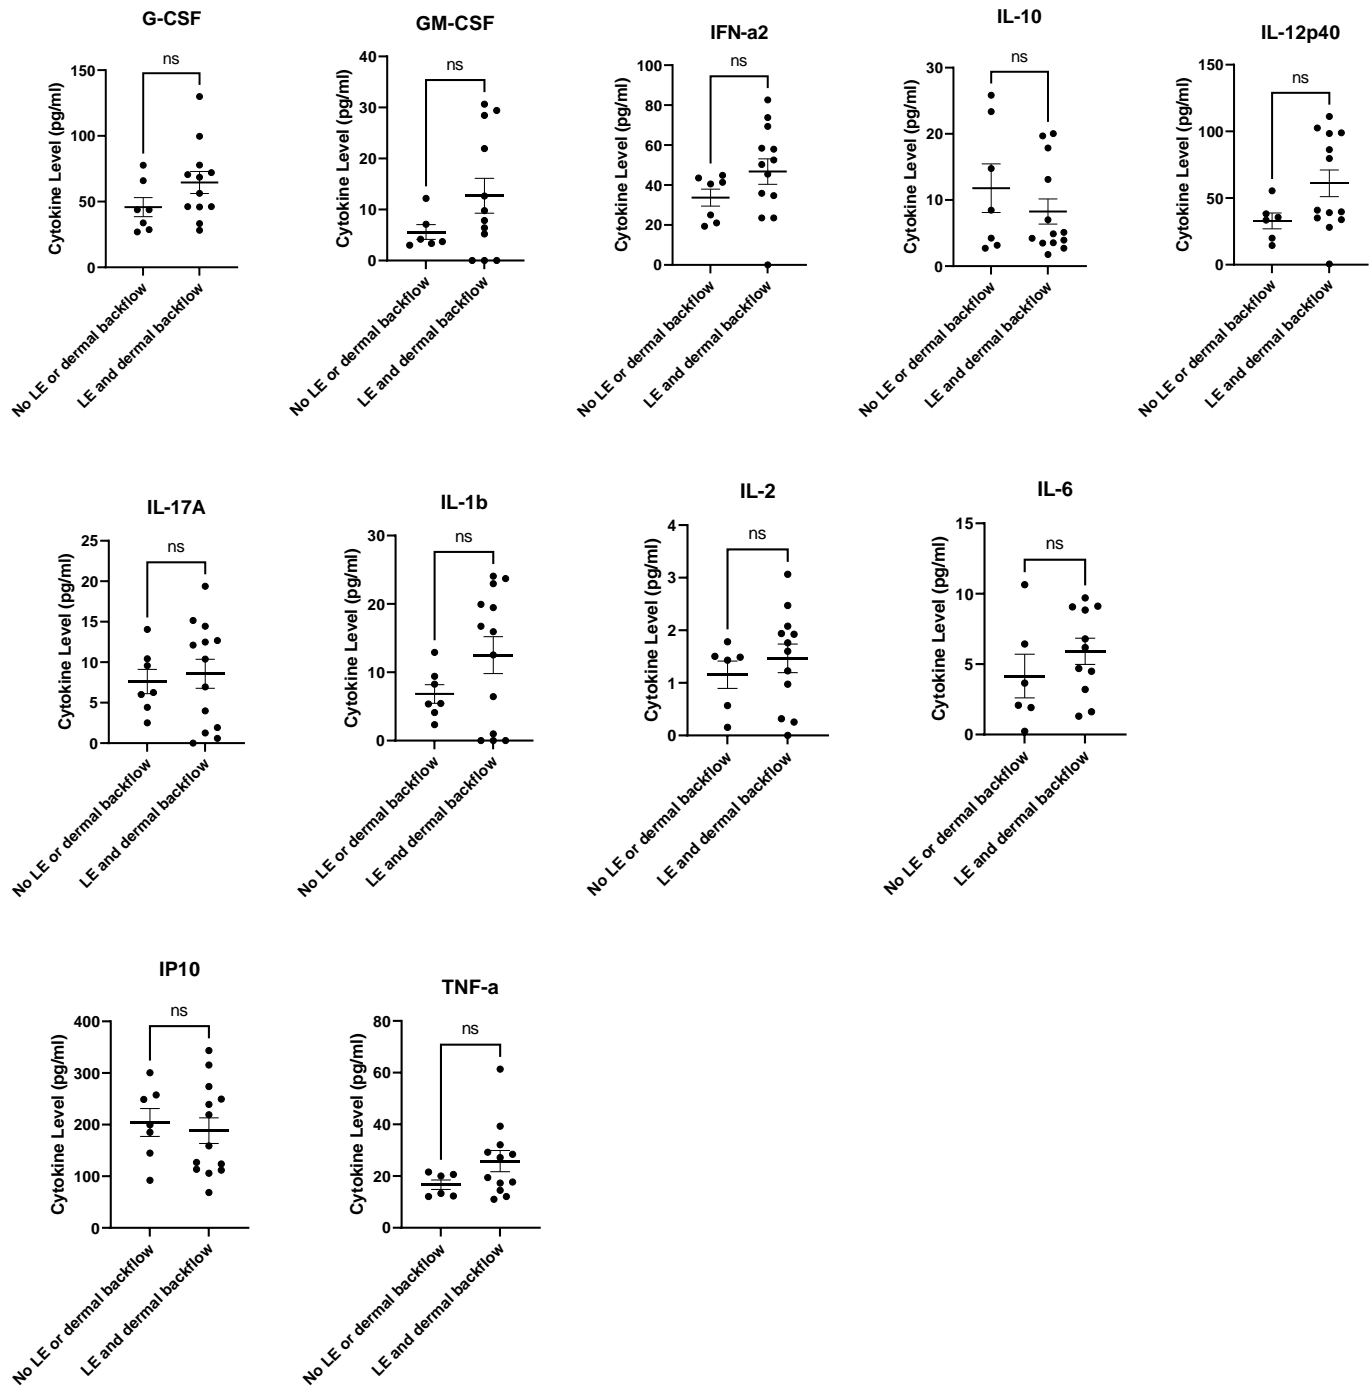

**Supplemental Figure S5.** Plasma cytokine/chemokine levels at 12 months post-RT were statistically non-significant in those with both clinical LE and dermal backflow at 12 months post-RT compared to those with neither clinical BCRL nor dermal backflow.

**STROBE Checklist/Table**

| Item and Number             | Responses to recommendations or Locations within Manuscript                                                                                                           | Page Number(s) or Location                                                          |
|-----------------------------|-----------------------------------------------------------------------------------------------------------------------------------------------------------------------|-------------------------------------------------------------------------------------|
| 1) Title and abstract       | a) Predictive biomarkers for lymphedema in breast cancer patients<br>b) Abstract cohesively communicates what was done and found                                      | a) Page 1<br>b) Page 1 - Abstract                                                   |
| <b>Introduction</b>         |                                                                                                                                                                       |                                                                                     |
| 2) Background/rationale     |                                                                                                                                                                       | Introduction                                                                        |
| 3) Objectives               | Identify breast cancer patients at highest risk for BCRL before clinical diagnosis                                                                                    | Introduction - last paragraph                                                       |
| <b>Methods</b>              |                                                                                                                                                                       |                                                                                     |
| 4) Study Design             | Longitudinal, observational study over a year's time                                                                                                                  | Manuscript section 2.1                                                              |
| 5) Setting                  | MD Anderson Cancer Center, Houston, TX and University of Texas Health Sciences Center, Houston, TX                                                                    | Manuscript section 2.1                                                              |
| 6) Participants             | a) A total of 80 consented participants but only 40 were used in analysis<br>b) Full inclusion and exclusion of subject recruitment are located in supplementary data | a) Manuscript section 2.1                                                           |
| 7) Variables                | a) Plasma cytokine/chemokine levels<br>b) %RVC values<br>c) %EVD values                                                                                               | a) Manuscript section 2.6<br>b) Manuscript section 2.3<br>c) Manuscript section 2.4 |
| 8) Data sources/measurement | a) NIRF- LI imaging device and session were used for determination of dermal backflow<br>b) Perometric score measurements                                             | a) Manuscript section 2.2 and 2.7<br>b) Manuscript section 2.3                      |
| 9) Bias                     | MBA, JCR, and EMS independently assessed data collected, to avoid any bias in interpretation                                                                          |                                                                                     |
| 10) Study size              | A total of 80 consented participants but only 40 were used in analysis                                                                                                | Manuscript section 2.1                                                              |
| 11) Quantitative variables  | a) RVC scores $\geq 5\%$ were diagnosed with clinical LE<br>b) P-values $< 0.05$ were deemed significant                                                              | a) Manuscript section 2.3<br>b) Manuscript section 2.7                              |
| 12) Statistical methods     | Significance was calculated using Mann-Whitney non-parametric t-test on GraphPad Prism and Pearson's correlation values were calculated from Excel                    | Manuscript section 2.7                                                              |
| <b>Results</b>              |                                                                                                                                                                       |                                                                                     |
| 13) Participants            | A total of 80 subjects consented for study but only 40 subjects had sufficient data for analysis                                                                      | Manuscript section 2.1 and discussion- last paragraph                               |
| 14) Descriptive data        | Table 1 lists the demographics of all 40 subjects                                                                                                                     |                                                                                     |
| 15) Outcome data            |                                                                                                                                                                       |                                                                                     |
| 16) Main results            | Figures 3-8 and Supplemental figures 1-5 graphically depicts                                                                                                          |                                                                                     |

|                      |                                                                                                                                                             |                             |
|----------------------|-------------------------------------------------------------------------------------------------------------------------------------------------------------|-----------------------------|
|                      | significance and standard error of the mean for each cytokine                                                                                               |                             |
| 17) Other analyses   | Table 2 lists correlation values for all cytokines for each comparison group                                                                                |                             |
| <b>Discussion</b>    |                                                                                                                                                             |                             |
| 18) Key results      | a) Plasma cytokine/chemokine levels can predict who is most at risk in developing BCRL<br>b) There is an ongoing cycle of inflammation associated with BCRL | Manuscript sections 4 and 5 |
| 19) Limitations      | Small sample size and tracking of compression use                                                                                                           | Discussion – last paragraph |
| 20) Interpretation   | Discussion and Conclusions                                                                                                                                  | Manuscript sections 4 and 5 |
| 21) Generalizability | Conclusion                                                                                                                                                  | Manuscript section 5        |
| Other information    |                                                                                                                                                             |                             |
| 22) Funding          | NIH and CPRIT                                                                                                                                               | Funding and Acknowledgement |
